# Supplementary material
Source: publisher figshare collection journal article supplement (https://frontiersin.figshare.com/ndownloader/files/28168485)
Supplement: Supplementary file [file 28168485]

# Supplementary Material

Hippo pathway counter-regulates innate immunity in Hepatitis B  
virus infection

Xufeng Luo, Rui Zhang, Mengji Lu, Shi Liu, Hideo A. Baba, Guido Gerken,  
Heiner Wedemeyer, Ruth Broering

Correspondence to: [ruth.broering@uni-due.de](mailto:ruth.broering@uni-due.de)

## **This PDF file includes:**

Supplementary Figures 1 to 8  
Supplementary Tables 1 to 4



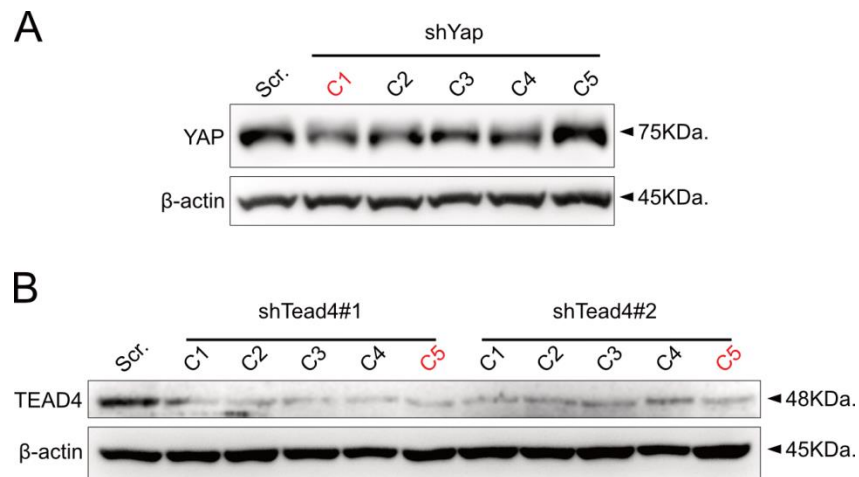

**Supplementary Figure 2. Effective knockdown subclones were selected after transfected shRNA-overexpressing vectors in Hepa1-6 cells.** The psiRNA-shYap and psiRNA-shTead4#1/#2 were transfected into Hepa1-6 cells, respectively, culture medium was supplemented with Zeocin (1000μg/ml) after 24 hours transfection. Keep selecting for one week. Selected Hepa1-6 were diluted and seeded in 96-well plates to obtain subclone. Down regulation of YAP was detected by Western blot, shYap-C1 subclone was selected for further experiments (A). Down regulation of TEAD4 was detected by Western blot, shTead4 #1C5 and shTead4 #2C5 subclones were selected for further experiments (B). Gel images were obtained with ADVANCED Fluorescence and ECL Imager. kDa, kilodalton.

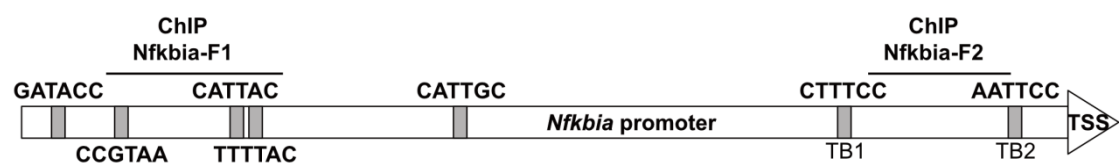

**Supplementary Figure 3. Scheme for YAP/TEAD4 binding sites in the *Nfkbia* promoter region (-977~+34, NM\_010907).** Grey boxes represent predicted TEAD4 binding sites (TB), the upper two lines showed the ChIP-qPCR products which were produced by two pair of specific ChIP primers. Two proximal binding sites were named as TB1 and TB2. TSS, transcription start site.

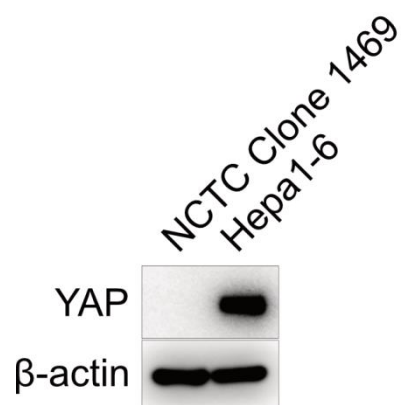

**Supplementary Figure 4. The abundance of YAP was different in NCTC Clone 1469 and Hepa1-6 cell lines.** Western blot was performed to determine YAP expression in Hepa1-6 and NCTC Clone 1469 cell lines. Gel images were obtained with ADVANCED Fluorescence and ECL Imager.

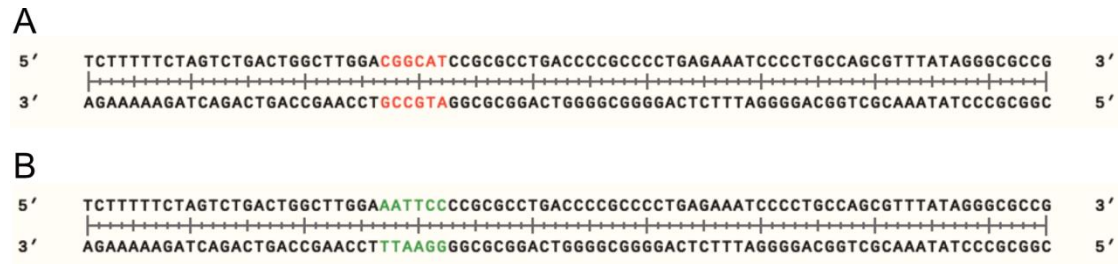

**Supplementary Figure 5. Wildtype TB2 and mutant TB2 sequence (-26~-21) information.** Red letters showed the mutant TB2 (A). Green letters showed the wildtype TB2 (B).

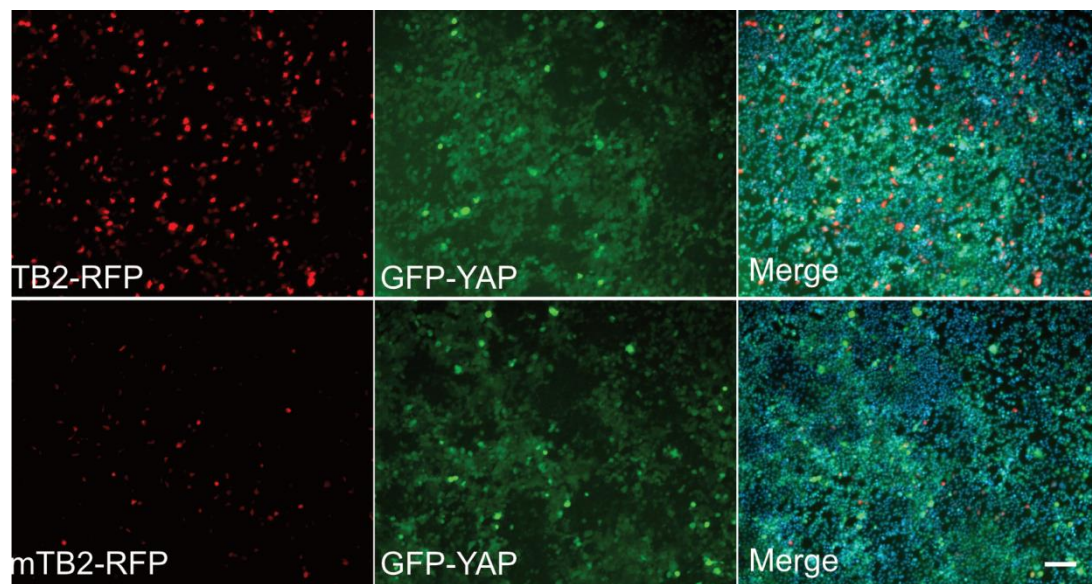

**Supplementary Figure 6. Mutated TB2 binding site weakened RFP signals in YAP-GFP-overexpressed Hepa1-6 cells.** TB2 and mTB2 binding sites were cloned into RFP reporter plasmid, respectively. Plasmids were transfected into YAP-GFP-overexpressed Hepa1-6 cells. After 48 hours, RFP signals were observed with Zeiss AxioObserver.Z1 and Apotome (10x objective). Scale bar is 100 $\mu$ m.

[illegible]



B

**HALLMARK\_TNFA\_SIGNALING\_VIA\_NFKB**

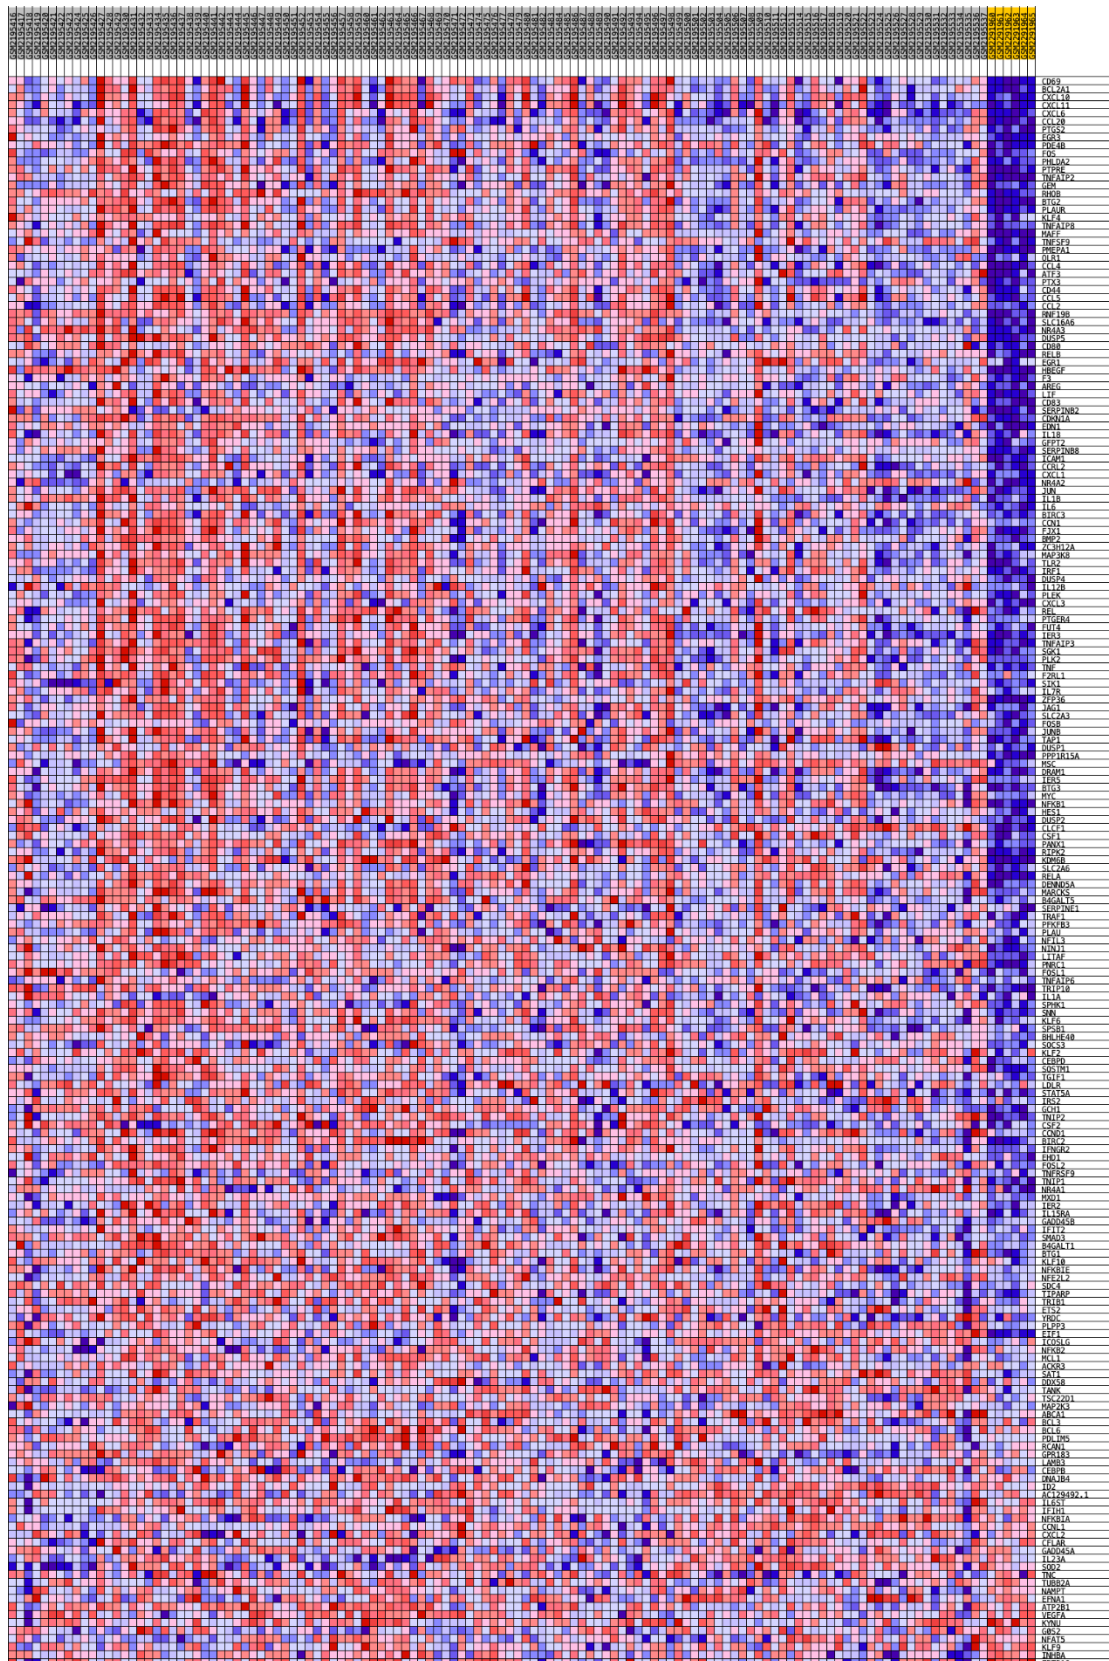

C

## HALLMARK\_INFLAMMATORY\_RESPONSE

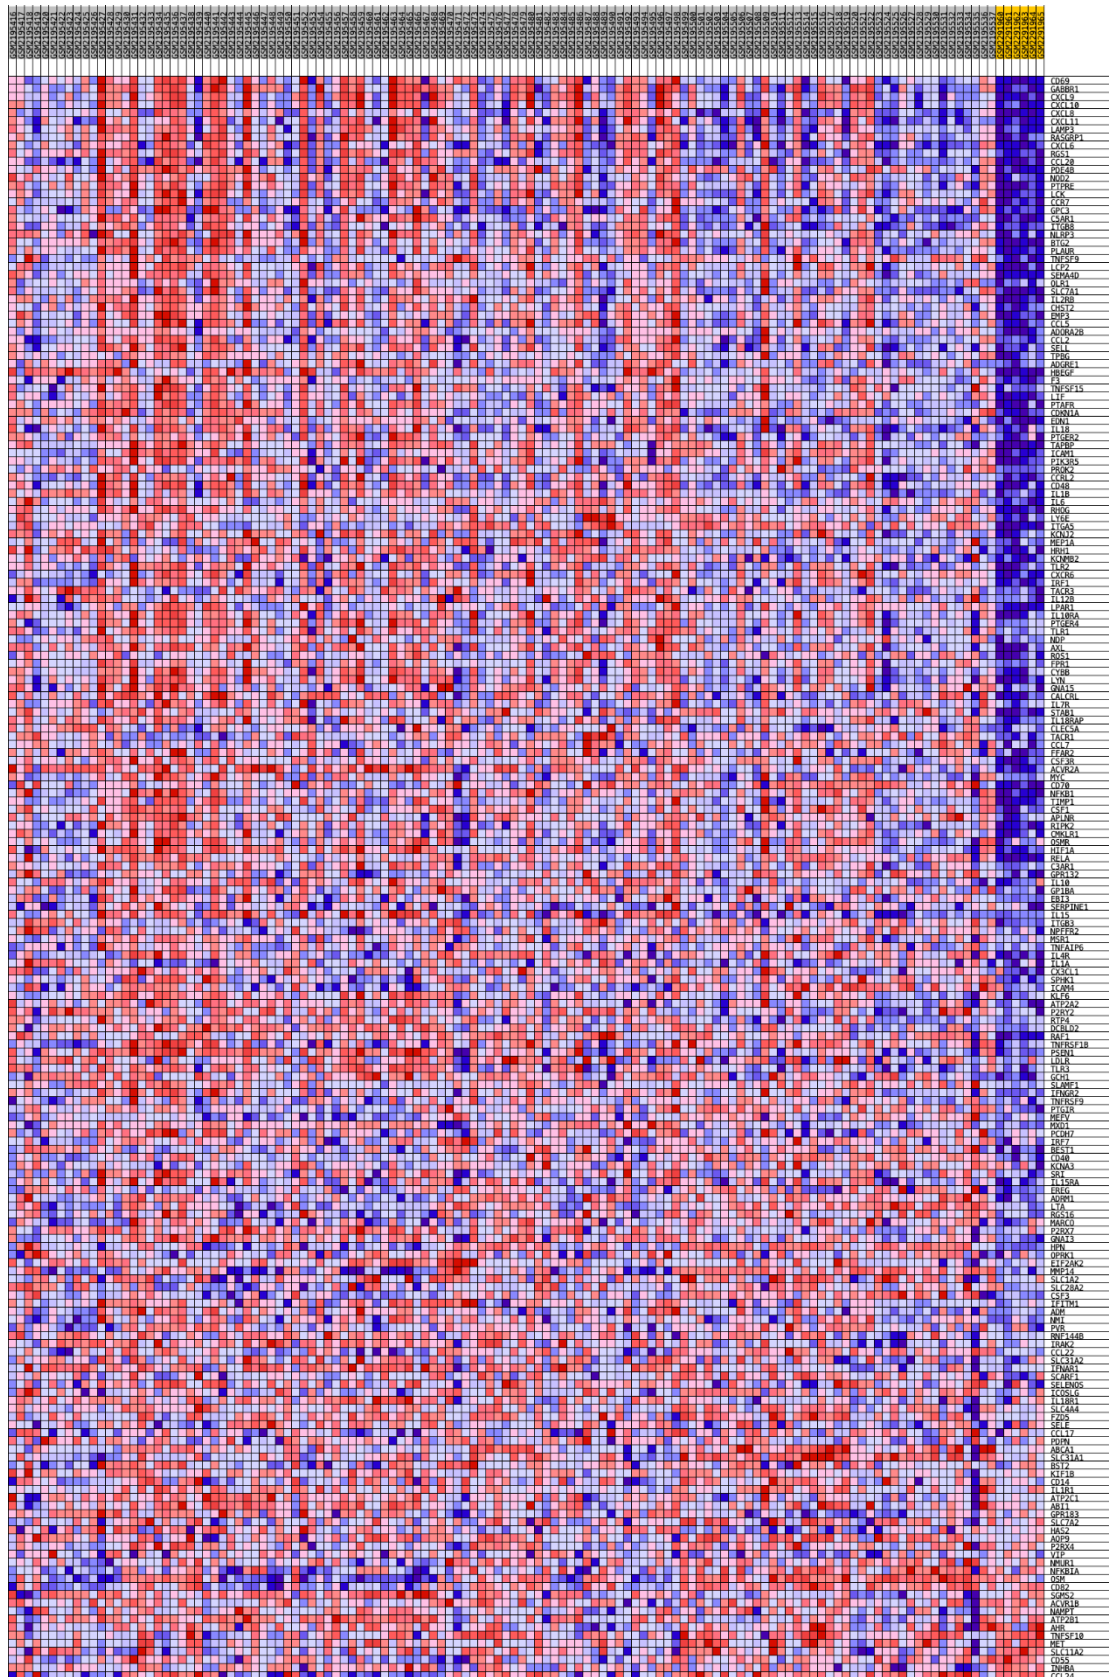

D

### CORDENONSI\_YAP\_CONSERVED\_SIGNATURE

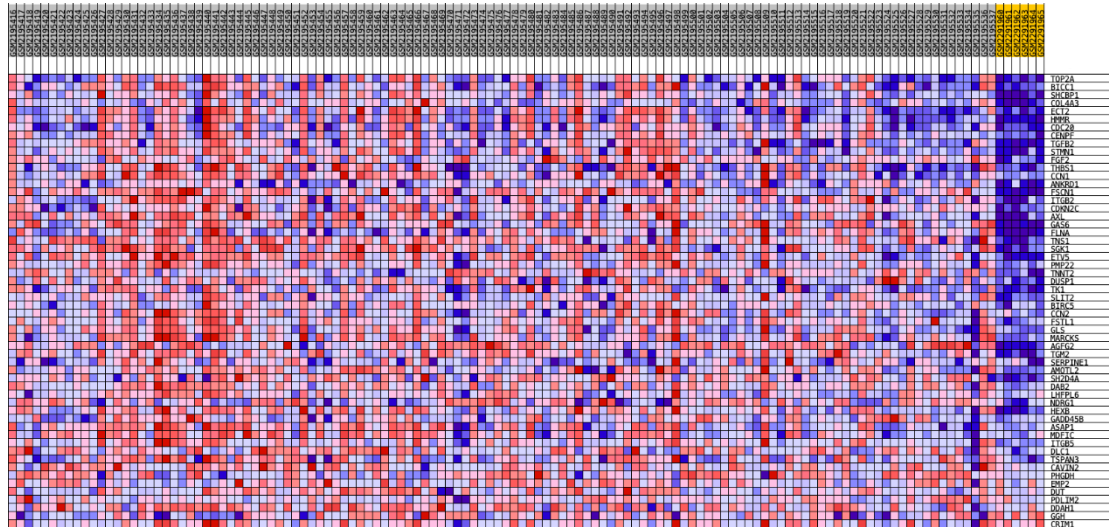

**Supplementary Figure 7. HBV infection induces TLR responses, inflammatory signaling and YAP-conserved gene expression in patients with chronic hepatitis B.** In GSE83148 hepatic gene expression was analyzed by microarray including liver biopsies of 122 HBV-infected patients (shaded in grey) and 6 uninfected controls (shaded in yellow). Gen set enrichment analysis of GSE83148 GEO data set was performed (matrix based on log2 values). Following gen sets

- A) KEGG\_TOLL\_LIKE\_RECEPTOR\_SIGNALING\_PATHWAY
- B) HALLMARK\_TNFA\_SIGNALING\_VIA\_NFKB
- C) HALLMARK\_INFLAMMATORY\_RESPONSE
- D) CORDENONSI\_YAP\_CONSERVED\_SIGNATURE

were visualized in heatmaps indicating gene IDs and signal intensities. Expression values are represented as colors, where the range of colors (red, pink, light blue, dark blue) shows the range of expression values (high, moderate, low, lowest).

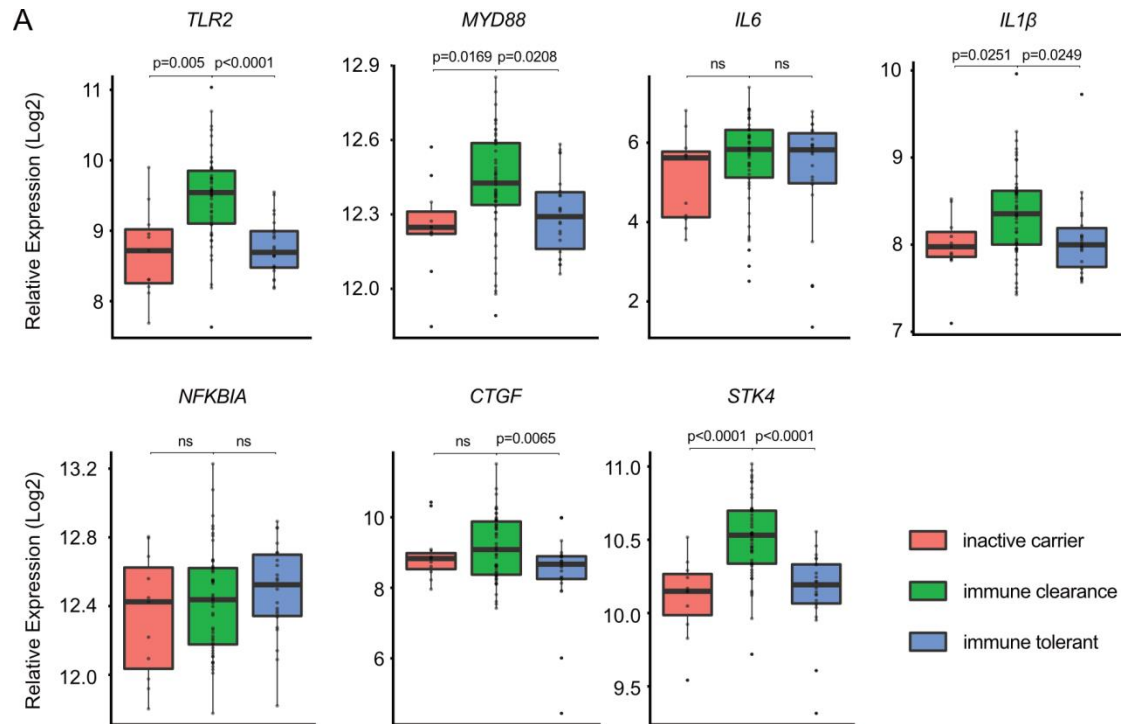

**Supplementary Figure 8. *TLR2-MYD88-STK4* axis was activated in immune clearance phase of chronic HBV infection.** GSE65359 data set was reanalyzed to show relative expression of genes. 83 chronic hepatitis B patients (22 immune tolerant, 50 immune clearance, and 11 inactive carrier state) were included in the data set. *TLR2*, *MYD88*, *IL6*, *IL1 $\beta$* , *NFKBIA*, *CTGF* and *STK4* mRNA level were reanalyzed in each group (A).

**Supplementary Table 1.** siRNA and shRNA sequences

| siRNA/shRNA                | Target sequence (5'-3')     | mRNA accession no. |
|----------------------------|-----------------------------|--------------------|
| Non-silencing control (NC) | CAACAAGATGAAGAGCACCAA-dT-dT | -                  |
| Yap                        | CTGGTCAAAGATACTTCTTAA-dT-dT | NM_009534          |
| Tead4#1                    | GCTGAAACACTTACCCGAGAA-dT-dT | NM_011567          |
| Tead4#2                    | CCCTCTCTGTGAGTACATGAT-dT-dT | NM_011567          |

**Supplementary Table 2.** ChIP primer

| Gene                              | Sequence (5'-3')          |
|-----------------------------------|---------------------------|
| <i>Nfkb1a</i> -fragment1-forward  | TTGCTCTGCTAGGCATTCACAA    |
| <i>Nfkb1a</i> -fragment1-reverse  | CCGTATGGGAACCACATTTTTC    |
| <i>Nfkb1a</i> -fragment2-forward  | TCAAAAAGTTCCCTGTGCATGA    |
| <i>Nfkb1a</i> -fragment2-reverse  | CCAAGCCAGTCAGACTAGAAAAAGA |
| neg-control- <i>Ctgf</i> -forward | CAGTGGAGATGCCAGGAGAAA     |
| neg-control- <i>Ctgf</i> -reverse | CCCCGGTTACACTCCAAAAA      |
| pos-control- <i>Ctgf</i> -forward | CTTCTTGGTGTTGTGCTGGAAAC   |
| pos-control- <i>Ctgf</i> -reverse | GACCCCTTGACACTCCACATTC    |

neg, negative; pos, positive.

**Supplementary Table 3.** Quantitative PCR primer

| Gene                   | Sequence (5'-3')        | mRNA accession no. |
|------------------------|-------------------------|--------------------|
| <i>mActb</i> forward   | AAATCGTGCGTGACATCAAA    | NM_007393          |
| <i>mActb</i> reverse   | CAAGAAGGAAGGCTGGAAAA    |                    |
| <i>mNfkb1a</i> forward | TCCTGCAGGCCACCAACTA     | NM_010907          |
| <i>mNfkb1a</i> reverse | TCAGCACCCAAAGTCACCAA    |                    |
| <i>mCtgf</i> forward   | GTGTGCACTGCCAAAGATGGTGC | NM_010217          |
| <i>mCtgf</i> reverse   | GCACGTCCATGCTGCACAG     |                    |
| <i>hACTB</i> forward   | TCCCTGGAGAAGAGCTACGA    | NM_001101          |
| <i>hACTB</i> reverse   | AGCACTGTGTTGGCGTACAG    |                    |
| <i>hYAP</i> forward    | GGTTGGGAGATGGCAAAGAC    | NM_001130145       |
| <i>hYAP</i> reverse    | GGGTCCTGCCATGTTGTTGT    |                    |
| <i>hNFKB1A</i> forward | GAGACCTGGCCTTCCTCAACT   | NM_020529          |
| <i>hNFKB1A</i> reverse | TTCTGGCTGGTTGGTGATCA    |                    |
| <i>hCTGF</i> forward   | GGAGCGCCTGTTCCAAGAC     | NM_001901          |
| <i>hCTGF</i> reverse   | CTGCAGGAGGCGTTGTCATT    |                    |

m, murine; h, human.

Expression of murine *Il6*, *Il1β*, *Tnf* and human *IL6*, *IL1β*, *TNF* was detected by commercially available primer sets (QuantiTec Primer Assay, Qiagen; sequences are not given by the manufacturer).

**Supplementary Table 4.** Antibodies for immunoblot, immunostaining and ChIP

| Name                                                        | Dilution                         | Source                 |
|-------------------------------------------------------------|----------------------------------|------------------------|
| YAP                                                         | WB: 1:1000                       | Cell Signaling, #4912  |
| p-YAP                                                       | WB: 1:1000                       | Cell Signaling, #4911  |
| PP2A                                                        | WB: 1:1000                       | Cell Signaling, #2038  |
| p-PP2A                                                      | WB: 1:200                        | Santa Cruz, # sc271903 |
| NF- $\kappa$ B                                              | WB: 1:1000                       | Cell Signaling, #8242  |
| I $\kappa$ B $\alpha$                                       | WB: 1:100                        | Santa Cruz, # sc1643   |
| p-NF- $\kappa$ B                                            | WB: 1:1000                       | Cell Signaling, #3033  |
| IRAK4                                                       | WB: 1:1000                       | Cell Signaling, #4363  |
| MyD88                                                       | WB: 1:1000                       | Cell Signaling, #4283  |
| MST1                                                        | WB: 1:1000                       | Cell Signaling, #3682  |
| MST2                                                        | WB: 1:1000                       | Cell Signaling, #3952  |
| p-MST1/2                                                    | WB: 1:1000                       | Cell Signaling, #49332 |
| $\beta$ -actin                                              | WB: 1:2000                       | Cell Signaling, #3700  |
| Anti-Rabbit-IgG                                             | WB: 1:2000                       | Cell Signaling, #7074  |
| anti-Mouse-IgG                                              | WB: 1:2000                       | Sigma, #4416           |
| Donkey Anti-Rabbit IgG-Alexa Fluor 488                      | ICC: 1:2000                      | Abcam, #ab150073       |
| Donkey anti-Mouse IgG Highly Cross-Adsorbed-Alexa Fluor 594 | ICC: 1:500                       | Invitrogen, #A21207    |
| YAP                                                         | ICC: 1:100                       | Cell Signaling, #14074 |
| NF- $\kappa$ B                                              | ICC: 1:800                       | Cell Signaling, #6956  |
| TEAD4                                                       | ChIP: 10 $\mu$ g/IP<br>WB: 1:500 | Abcam, # ab58310       |

WB, Western blot; ICC, immunocytochemistry; ChIP, chromatin immunoprecipitation.
